# Supplementary material
Source: Springer Nature journal article supplement (https://www.springermedizin.de/resource/supplementary/12913_2009_1169_MOESM1_ESM.pdf/9528202)

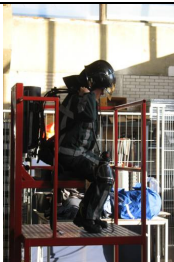

**Part 2**

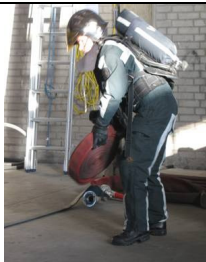

**Part 3**

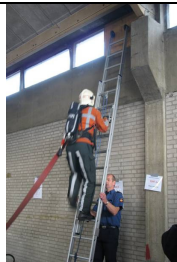

**Part 4**

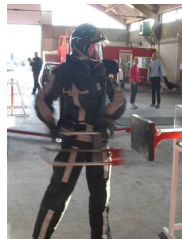

**Part 5**

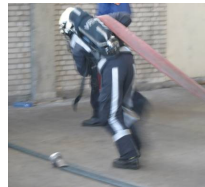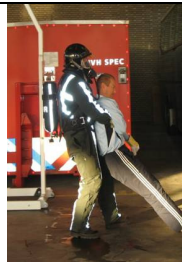

**Part 7**

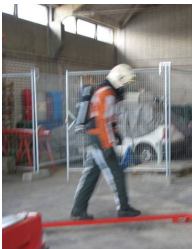

**Part 8**

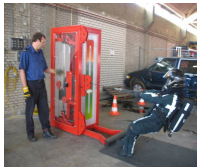

**Part 9**

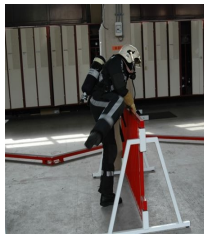

**Part 10**

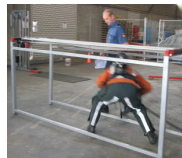

**Part 11**

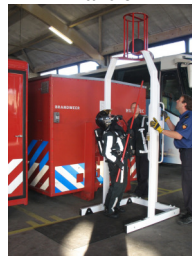

**Part 12**

Supplement: MOESM1 [file 9528202]
